# Supplementary material for: Trends in Cost Attributable to Kidney Transplantation Evaluation and Waiting List Management in the United States, 2012-2017
Source: PubMed Central journal article supplement (PMC8914579; doi:10.1001/jamanetworkopen.2022.1847), 2022-03-10
Supplement: jamanetwopen-e221847-s001.pdf [file jamanetwopen-e221847-s001.pdf]

## Supplemental Online Content

Cheng XS, Han J, Braggs-Gresham JL, et al. Trends in cost attributable to kidney transplantation evaluation and waiting list management in the United States, 2012-2017. *JAMA Netw Open*. 2022;5(3):e221847. doi:10.1001/jamanetworkopen.2022.1847

**eAppendix 1.** Data Sources

**eAppendix 2.** Associations of UNOS Region on Transplantation Volumes and Mean OACC per Kidney Transplantation

**eAppendix 3.** Alternative Parameterization of Transplantation and Waiting List Volumes as a Linear Term and a Quadratic Term

**eAppendix 4.** Companion Analysis: Association of Waiting List-to-Transplantation Ratio on Mean OACC Cost per Kidney Transplantation

This supplemental material has been provided by the authors to give readers additional information about their work.

**eAppendix 1. Data Sources**

**Figure S1.** Data sources used. Grey circles represent the data sources and boxes represent the data elements taken from each data source.

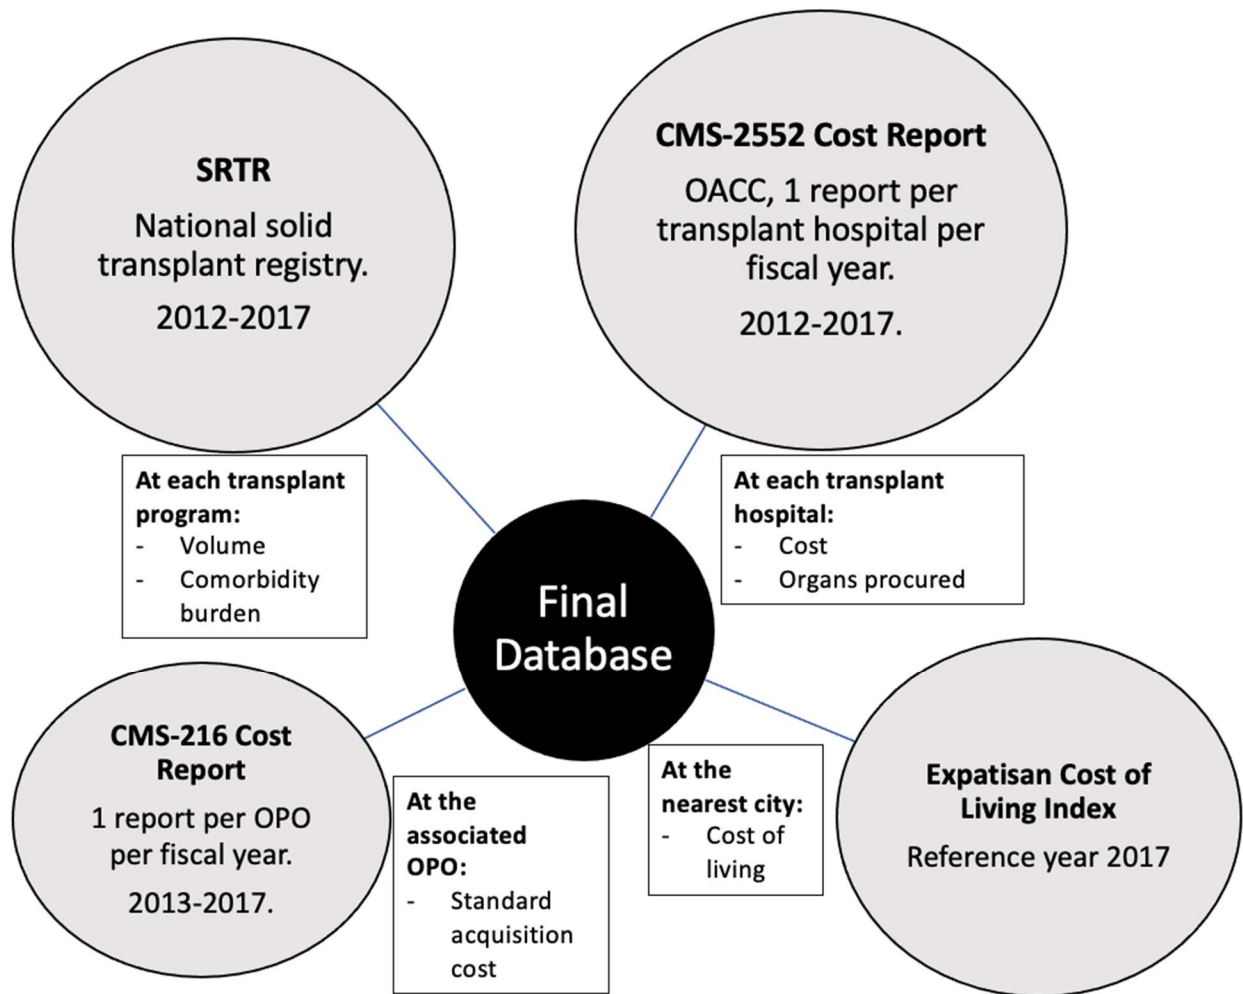

**eAppendix 2.** Associations of UNOS Region on Transplantation Volumes and Mean OACC per Kidney Transplantation

*Figure S1. Transplant volumes across the study period, stratified by UNOS Region.*

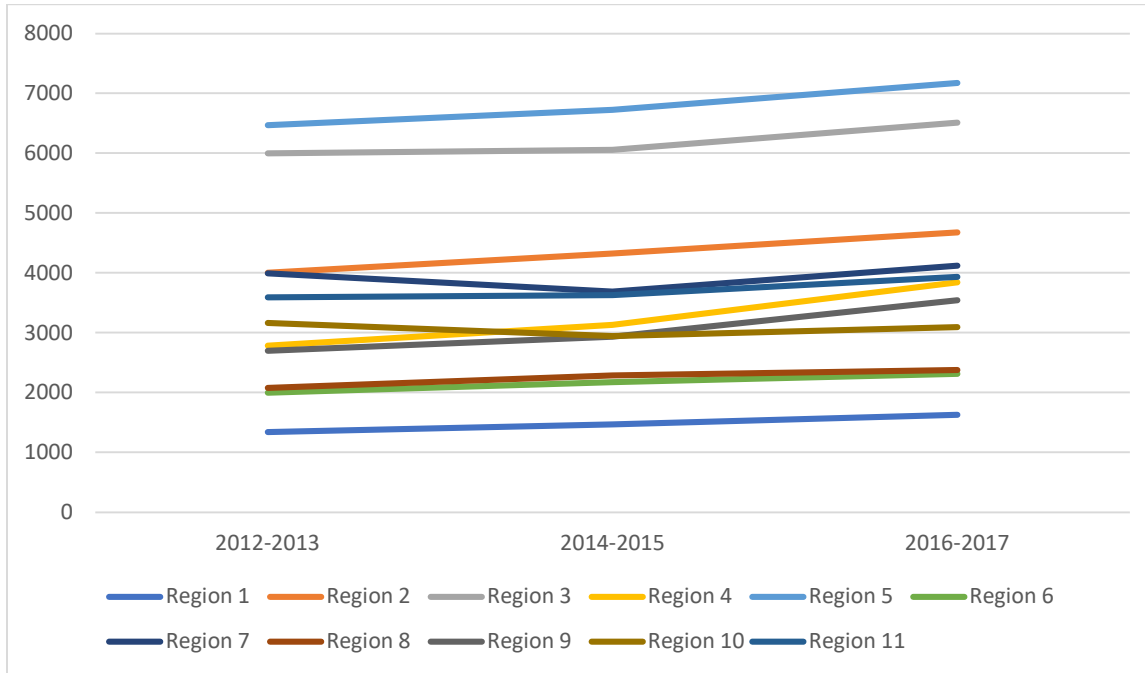

*Figure S2. Effects of UNOS Region on mean OACC per kidney transplant. Univariate model only contains region in the model. Multivariate model includes price index as well as region.*

|        | Univariate Model |         | Multivariate Model |         |
|--------|------------------|---------|--------------------|---------|
| Region | Effect Size      | p-value | Effect Size        | p-value |
| 1      | -4.8%            | 0.60    | -7.5%              | 0.43    |
| 2      | +15%             | 0.16    | +9.6%              | 0.36    |
| 3      | +2.3%            | 0.80    | -0.1%              | 1.00    |
| 4      | +22%             | 0.07    | +17%               | 0.15    |
| 5      | +18%             | 0.09    | +15%               | 0.16    |
| 6      | +7.4%            | 0.59    | +4.1%              | 0.77    |
| 7      | +10%             | 0.30    | +8.7%              | 0.38    |
| 8      | -17%             | 0.07    | -17%               | 0.06    |
| 9      | +29%             | 0.03    | +14%               | 0.23    |
| 10     | -0.2%            | 0.98    | -0.4%              | 0.97    |
| 11     | ref              | n/a     | ref                | n/a     |

**eAppendix 3.** Alternative Parameterization of Transplantation and Waiting List Volumes as a Linear Term and a Quadratic Term

**Table 2** in the paper illustrate the main results illustrating the relationship between 1) OACC per KTx and 2) OACC less Standard Acquisition Charge per KTx. We modelled transplant and waitlist volumes as a linear term.

We also explored alternative models in which we modelled the transplant and waitlist volumes as quadratic terms. To compare model fit, we examined the quasilielihood of independence model criterion (QIC) of each model under different variable parameterization assumptions:

| Outcome                                            | Transplant and Waitlist Volumes as Linear Terms | Transplant and Waitlist Volumes as Quadratic Terms | Better Model |
|----------------------------------------------------|-------------------------------------------------|----------------------------------------------------|--------------|
| Mean OACC per KTx                                  | QIC=1327                                        | QIC=1326                                           | Linear       |
| Mean OACC less Standard Acquisition Charge per KTx | QIC=920                                         | QIC=919                                            | Linear       |

The following table illustrates the results of the models in which transplant and waitlist volumes are modelled as quadratic terms.

| <b>Outcome: OACC per KTx</b>      |                                      |                |                                      |                          |                |
|-----------------------------------|--------------------------------------|----------------|--------------------------------------|--------------------------|----------------|
|                                   | <b>Univariate Model (Unadjusted)</b> |                | <b>Multivariate Model (Adjusted)</b> |                          |                |
|                                   | <b>Estimate (95% CI)</b>             | <b>p-value</b> | <b>Estimate (95% CI)</b>             | <b>Effect on Outcome</b> | <b>p-value</b> |
| Year (per year)                   | 0.035<br>(0.026, 0.043)              | <0.0001        | 0.045<br>(0.037, 0.052)              | +4.6%<br>(3.58 5.3)      | <0.0001        |
| Local price index (per 10)        | 0.013<br>(-0.004, 0.030)             | 0.1            | 0.021<br>(0.003, 0.038)              | +2.1%<br>(0.3, 3.9)      | 0.02           |
| Waitlist volume (per 100)         | 0.0023<br>(-0.011, 0.016)            | 0.7            | -                                    | -                        | -              |
| Waitlist volume (per 100) squared | -0.0002                              | 0.3            | -                                    | -                        | -              |

|                                                         |                                      |                |                                      |                          |                |
|---------------------------------------------------------|--------------------------------------|----------------|--------------------------------------|--------------------------|----------------|
|                                                         | (-0.0005, 0.0001)                    |                |                                      |                          |                |
| Waitlist active volume (per 100)                        | -0.0056<br>(-0.0249, 0.0136)         | 0.6            | -                                    | -                        | -              |
| Waitlist volume (per 100) squared                       | -0.0001<br>(-0.0007, 0.0005)         | 0.9            | -                                    | -                        | -              |
| Transplant volume (per 10)                              | -0.061<br>(-0.077, -0.045)           | <0.0001        | -0.069<br>(-0.083, -0.055)           | na                       | <0.0001        |
| Transplant volume (per 10) squared                      | 0.0014<br>(0.0009, 0.0018)           | <0.0001        | 0.0014<br>(0.001, 0.002)             | na                       | <0.0001        |
| Percent waitlisted patients with EPTS 81-100 (per 1%)   | 0.014<br>(0.004, 0.024)              | 0.008          | 0.016<br>(0.007, 0.026)              | +1.6%<br>(0.7, 2.6)      | 0.007          |
| Percent transplanted patients with EPTS 81-100 (per 1%) | 0.0027<br>(-0.0026, 0.0080)          | 0.4            | -                                    | -                        | -              |
| <b>Outcome: OACC minus SAC</b>                          |                                      |                |                                      |                          |                |
|                                                         | <b>Univariate Model (Unadjusted)</b> |                | <b>Multivariate Model (Adjusted)</b> |                          |                |
|                                                         | <b>Estimate (95% CI)</b>             | <b>p-value</b> | <b>Estimate (95% CI)</b>             | <b>Effect on Outcome</b> | <b>p-value</b> |
| Year (per year)                                         | 0.029<br>(0.008, 0.050)              | 0.007          | 0.045<br>(0.026, 0.065)              | +4.6%<br>(2.6, 6.7)      | <0.0001        |
| Local price index (per 10)                              | -0.006<br>(-0.035, 0.024)            | 0.7            | -                                    | -                        | -              |
| Waitlist volume (per 100)                               | -0.0030<br>(-0.024, 0.018)           | 0.8            | -                                    | -                        | -              |
| Waitlist volume (per 100) squared                       | -0.0001<br>(-0.0006, 0.0003)         | 0.6            | -                                    | -                        | -              |
| Waitlist active volume (per 100)                        | -0.0148<br>(-0.0441, 0.0146)         | 0.3            | -                                    | -                        | -              |
| Waitlist volume (per 100) squared                       | 0.0001<br>(-0.0008, 0.0009)          | 0.9            | -                                    | -                        | -              |
| Transplant volume (per 10)                              | -0.074<br>(-0.097, -0.052)           | <0.0001        | -0.086<br>(-0.108, -0.064)           | na                       | <0.0001        |
| Transplant volume (per 10) squared                      | 0.0016                               | <0.0001        | 0.002<br>(0.001, 0.002)              | na                       | <0.0001        |

|                                                         |                                |       |                         |                     |       |
|---------------------------------------------------------|--------------------------------|-------|-------------------------|---------------------|-------|
|                                                         | (0.0009,<br>0.0022)            |       |                         |                     |       |
| Percent waitlisted patients with EPTS 81-100 (per 1%)   | 0.014<br>(0.004, 0.024)        | 0.008 | 0.032<br>(0.017, 0.048) | +3.3%<br>(1.7, 4.9) | 0.007 |
| Percent transplanted patients with EPTS 81-100 (per 1%) | 0.0027<br>(-0.0026,<br>0.0080) | 0.4   | -                       | -                   | -     |

**eAppendix 4.** Companion Analysis: Association of Waiting List-to-Transplantation Ratio on Mean OACC Cost per Kidney Transplantation

Waitlist-to-transplant ratio was log-transformed, since the variable was heavily right-skewed (median 4.7, IQR 3.0-7.1, range 0-97).

|                                                                   | Univariate Model<br>(Unadjusted) |         | Multivariate Model<br>(Adjusted) |         |
|-------------------------------------------------------------------|----------------------------------|---------|----------------------------------|---------|
|                                                                   | Effect Size<br>Estimate (95% CI) | p-value | Effect Size<br>Estimate (95% CI) | p-value |
| Year (per year)                                                   | +3.6%<br>(2.6, 4.4)              | <0.0001 | +3.9%<br>(3.1, 4.7)              | <0.0001 |
| Local price index<br>(per 10)                                     | +1.3%<br>(-0.4, 3.0)             | 0.12    | -0.1%<br>(-1.6, 1.4)             | 0.87    |
| Percent<br>waitlisted<br>patients with<br>EPTS 81-100<br>(per 1%) | +1.4%<br>(0.4, 2.4)              | 0.008   | -0.8%<br>(-1.6, 0.04)            | 0.06    |
| Log (Waitlist-to-<br>transplant ratio)                            | +31%<br>(25, 37)                 | <0.0001 | +31%<br>(25, 38)                 | <0.0001 |
